# Supplementary material for: Nanoparticle transformation from ZnO to ZnS through anion exchange with di-tert-butyl disulphide
Source: Royal Society of Chemistry journal article supplement (doi:10.1039/d0dt03940c), 2021-01-01
Supplement: d0dt03940c1.pdf [file d0dt03940c1.pdf]

Supplementary Data

**Nanoparticle transformation from ZnO to ZnS  
through anion exchange reaction with di-tert butyl disulphide**

Yun-Kun Hong, Yoonsu Park, Hyeri Kang, Hyungbin Son\* and Don-Hyung Ha\*

School of Integrative Engineering, Chung-Ang University, 84 Heukseok-ro, Dongjak-gu, Seoul, 06974,  
Republic of Korea

\* To whom correspondence should be addressed.

Email: [dhha@cau.ac.kr](mailto:dhha@cau.ac.kr) (D-H. Ha), Phone: +82-2-820-5565

Email: [being@cau.ac.kr](mailto:being@cau.ac.kr) (H-B. Son), Phone:+82-2-820-5369

**Table S1.** The calculated crystalline size (a) and particle and void size (b) via XRD pattern and TEM images.

**(a)**

| <b>Crystalline size (nm)</b>   | <b>(100)</b> | <b>(002)</b> | <b>(101)</b> | <b>Average crystalline size</b> |
|--------------------------------|--------------|--------------|--------------|---------------------------------|
| Q-ZnO                          | 14.84        | 16.32        | 14.55        | 15.23                           |
| Anion exchanged NPs for 30 min | 15.25        | 15.76        | 14.84        | 15.28                           |
| Anion exchanged NPs for 1 hour | 16.23        | 15.7         | 14.87        | 15.6                            |

**(b)**

|                           | <b>Q-ZnO</b> | <b>Anion exchanged NPs for 30 min</b> | <b>Anion exchanged NPs for 1 hour</b> | <b>Anion exchanged NPs for 2 hours</b> |
|---------------------------|--------------|---------------------------------------|---------------------------------------|----------------------------------------|
| <b>Particle size (nm)</b> | 14.9 ± 1.78  | 20.25 ± 2.8                           | 19.26 ± 2.9                           | 20.52 ± 3.2                            |
| <b>Void size (nm)</b>     | X            | 4.22 ± 0.98                           | 5.75 ± 1.23                           | 8.17 ± 1.89                            |

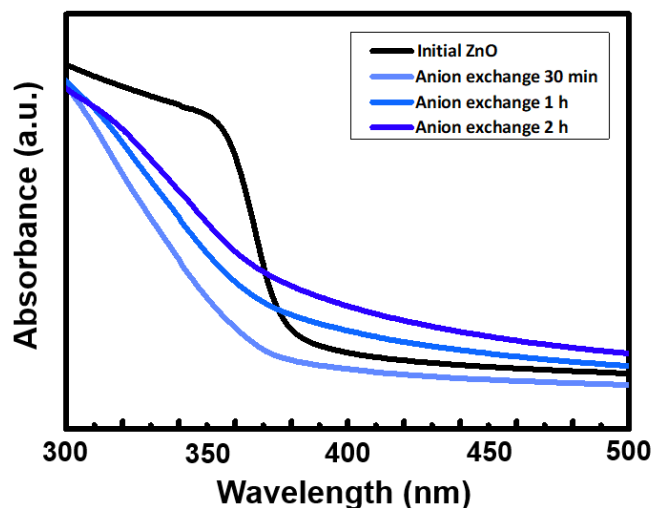

**Figure S1.** UV-vis spectra of initial ZnO NPs and anion exchanged NPs for 2 h with TBDS as a sulphur source. The strong intrinsic absorption peak of initial ZnO NPs at  $\sim 360$  nm suggests that the initial ZnO was high crystalline NPs. In ZnO NPs, no significant absorbance for visible light was observed due to their wide energy band gap (3.2 eV). In the anion exchanged NPs for 2 h, absorption band edges were gradually red-shifted, indicating that the electronic structure of NPs was tuned by anion exchange from ZnO to ZnS. Additionally, the absorption of anion exchanged NPs for 1 h and 2 h in the visible region was promoted compared to the initial ZnO NP and anion exchanged NPs for 1 h, which may be attributed by the formation of hybrid bands/orbitals of ZnO and ZnS at interfaces.<sup>1</sup>

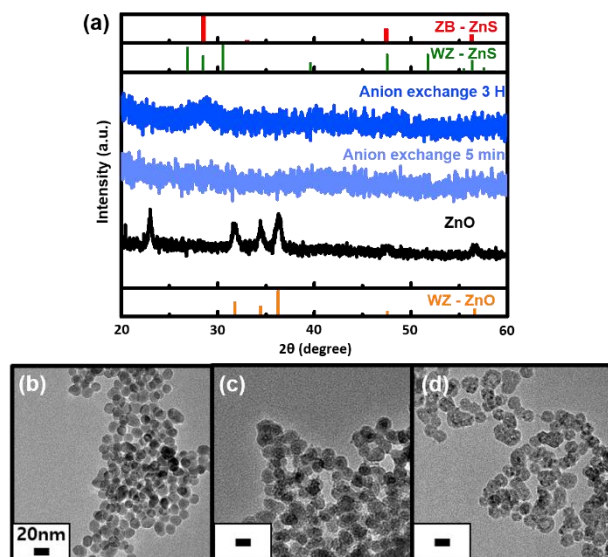

**Figure S2.** XRD pattern (a) and (b)-(d) TEM images of anion-exchanged NPs synthesized with an elemental sulfur. (b) 5 min, (c) 2 h, (d) 3 h (WZ-ZnO, orange bar, PDF 01-070-8070, WZ-ZnS, green bar, PDF 01-079-2204 and ZB-ZnS, red bar, PDF 03-065-0309, respectively).

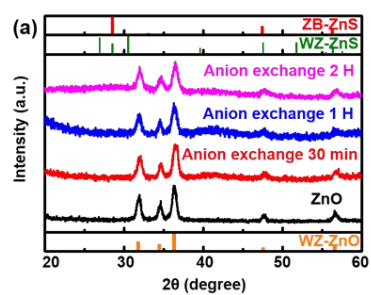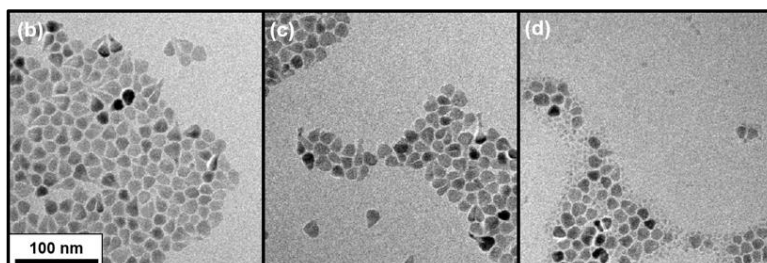

**Figure S3.** XRD pattern (a) and (b)-(d) TEM images of anion-exchanged NPs synthesized with 1-dodecanethiol (DDT). (b) 30 min, (c) 1 h, (d) 2 h (WZ-ZnO, orange bar, PDF 01-070-8070, WZ-ZnS, green bar, PDF 01-079-2204 and ZB-ZnS, red bar, PDF 03-065-0309, respectively).

## Reference

1. P. Devaraji, M. Mapa, H. M. Abdul Hakkeem, V. Sudhakar, K. Krishnamoorthy and C. S. Gopinath, *ACS Omega*, 2017, **2**, 6768-6781.
